# **Seroepidemiological survey on pigs and cattle for novel K88 (F4)-like colonization factor detected in human enterotoxigenic *Escherichia coli***

Yoshihiko Tanimoto<sup>1,2</sup>, Miyoko Inoue<sup>1</sup>, Kana Komatsu<sup>1</sup>, Atsuyuki Odani<sup>1</sup>, Takayuki Wada<sup>1</sup>, Eriko Kage-Nakadai<sup>1</sup>, Yoshikazu Nishikawa<sup>1,3</sup> \*

<sup>1</sup>Department of Food and Human Health Sciences, Graduate School of Human Life Science, Osaka City University, Osaka, Japan.

<sup>2</sup>Department of Infectious Diseases, Kobe Institute of Health, Hyogo, Japan (Present address).

<sup>3</sup> Faculty of Human Sciences, Tezukayamagakuin University, Osaka, Japan (Present address).

## **\* Author for correspondence**

Yoshikazu Nishikawa  
Faculty of Human Sciences; Tezukayamagakuin University; Osaka, Japan.  
E-mail: y-nishikawa@tezuka-gu.ac.jp

**Keywords:** cattle, enterotoxigenic *Escherichia coli*, K88 antigen, pig, seroepidemiology, zoonosis

## Abstract

Enterotoxigenic *Escherichia coli* (ETEC) strains that express various fimbrial or nonfimbrial colonization factors and enterotoxins are critical causes of diarrheal diseases. Human ETEC serotype O169:H41 (O169) has been a representative of epidemic ETEC worldwide; the organism shows massive adherence to HEp-2 cells similar to enteroaggregative *E. coli*. Previously, we determined the complete sequence of the unstable virulence plasmid, pEntYN10. The plasmid included a unique set of genes encoding a novel colonization factor (CF) resembling K88 (F4) of porcine ETEC, in addition to CS6, a well-known representative CF of human ETEC, and another novel CF similar to CS8 (CFA/III) of human ETEC. To determine whether the K88-like CF (after this, K88<sub>O169</sub>) allows the organisms to infect domestic animals like the original K88-harboring strains that can cause diarrhea in piglets, samples were tested for antibodies against recombinant proteins of possible paralogous adhesins, FaeG1 and FaeG2, from K88<sub>O169</sub> and the FaeG of typical K88 (F4). The seroepidemiological study using recombinant antigens (two paralogs FaeG1 and FaeG2 from K88<sub>O169</sub>) showed reactivity of porcine (18.0%) and bovine (17.1%) sera to K88<sub>O169</sub> FaeG1 and/or FaeG2 antigens on indirect ELISA tests. These results suggest that *E. coli* with K88<sub>O169</sub> adhesin can infect various hosts, including pigs and cattle. This is the first report of domestic animals having antibodies to K88<sub>O169</sub> of human ETEC. Although human ETEC had been thought to be distinguished from those of domestic animals based on colonization

41 factors, zoonotic strains may conceal themselves among human ETEC organisms. The  
42 concept of One Health should be adopted to intervene in ETEC infections among  
43 animals and humans.  
44

## Introduction

Enterotoxigenic *Escherichia coli* (ETEC) is a diarrheagenic *E. coli* that causes diarrhea not only in humans but in various animals, such as pigs, cattle, and sheep [1]. Regardless of host, colonization of the intestinal epithelia is an essential first step in the pathogenesis of ETEC infection mediated by a variety of colonization factors (CFs) [2]. Subsequently, ETEC secretes host-damaging toxins such as heat-labile (LT) and/or heat-stable (ST) enterotoxins, which give rise to intestinal symptoms such as diarrhea [3,4].

ST-producing ETEC O169:H41 (O169) was first identified as an etiological serotype in human foodborne cases in Japan [5]. Previously, we reported that the O169 strain YN10 harbors the unstable large plasmid pEntYN10, which codes for genes of three CFs, CS6 and two novel CFs called resembling CS8 (so-called CFA/III) and F4 (so-called K88). The operon coding the novel K88-like CF (hereinafter, K88<sub>O169</sub>) has two paralogous major adhesin-like subunits, *faeG1* and *faeG2*, which have 37%-44% amino acid homology with *faeG* of the original K88 [6].

K88 and its related CFs have been found with bacteria isolated from a variety of hosts. K88 was initially identified as a CF of swine ETEC [7,8], whereas CS31A was reported as a K88-related CF from bovine ETEC [9]. Thus, *E. coli* strains with analogous CFs were isolated from multiple hosts, suggesting that K88-related CFs can lead to colonization in various host species. Furthermore, an ETEC/Shiga toxin-producing *E. coli* (STEC) hybrid strain was recently isolated from a patient with

Hemolytic-Uremic Syndrome (HUS); the organism possessed an F4-like adhesin of the protein sequence that was similar to CS31A of bovine ETEC [10]. The presence of multiple CFs in O169 may indicate the potential for multi-host transmission: a complex zoonotic network may be supported, and this contradicts the one-to-one host-pathogen relationship that has been commonly accepted for ETEC.

This study examined the seroepidemiological status of livestock against K88<sub>O169</sub> as a preliminary investigation to test this hypothesis. Antibody titers against K88<sub>O169</sub> of pigs and cattle farmed in various areas in Japan were examined by an indirect ELISA method using recombinant proteins of the adhesins, FaeG.

## **Materials and Methods**

### ***Sample collection***

In this study, sera of 200 pigs and 105 cattle collected from June 2019 to March 2020 was kindly provided by the Osaka City Meat Hygiene Inspection Center for serological assays. This facility is partnered with the slaughterhouse and is responsible for hygiene inspections of meat supplied to the metropolitan area and also conducts research on livestock animals transported from a wide range of regions in Japan.

Breeders and the prefectures where the animals were raised are listed in **Supporting**

**Table 1.**

## Recombinant protein

Recombinant proteins were created using the pET expression system (Novagen). The codon-optimized typical *faeG* gene of the original K88 (K88ac variant, accession ID: AJ616239) [11] was synthesized by Eurofins Genomics KK (Tokyo, Japan). *faeG1* and *faeG2* genes of K88<sub>O169</sub> were amplified by PCR with O169 plasmid pEntYN10 [6] as the template. The primers are described in **Supporting Table 2**. The primers were designed to remove signal peptides predicted using SignalP 5.0 web-based resource [12] from the recombinant proteins. These gene products and pET30a vector (Novagen) were digested with *SalI* and *NotI* restriction enzymes and ligated. The resulting plasmids (pET30a-*faeG*, pET30a-*faeG1*, and pET30a-*faeG2*) were recovered by transformation into *E. coli* BL21 (DE3) with selection for kanamycin resistance. After the bacteria were grown at 37°C for 3 h, protein expression was induced with 1 mM of isopropyl-β-D-thiogalactopyranoside (IPTG; Takara Bio) at the final concentration at 25°C. After overnight incubation, the cells were solubilized with 8 M urea. The recombinant protein was purified using the His60 Ni gravity column purification kit (Takara Bio) according to the manual instruction. Finally, the solution was exchanged with phosphate buffered saline (PBS) using Amicon Ultra-15 10K Centrifugal Filter Devices (Merck). Purity was confirmed by the absence of contamination bands on SDS-PAGE.

## ***Antiserum***

Antiserum to the original K88 was purchased from Denka Seiken (*E. coli* K88 rabbit antiserum). Rabbit polyclonal antibodies against FaeG1 and FaeG2 developed by Eurofins Genomics Antibody Service were used as positive controls.

## ***Indirect ELISA***

Sample sera were examined for the antibodies against FaeG of K88, FaeG1 and FaeG2 of K88<sub>O169</sub> with indirect ELISA methods. Purified protein was coated on 96-well half-area plates (Corning) at 0.1 µg/mL with coating buffer (13 mM Na<sub>2</sub>CO<sub>3</sub>, 35 mM NaHCO<sub>3</sub>) overnight 4°C. After washing three times with PBS-T (PBS containing 0.05% Tween-20), plates were blocked by adding blocking buffer (0.4% Block Ace, Dainippon Pharmaceutical) and incubated for 1-2 h. After three washes, sample sera (1:200 dilution in PBS-T) and antibodies (1:1000 dilution) as positive control were added to the plate and incubated for 1 h. After three washes, a 1:30,000 dilution of the second antibody solution was added to each well and incubated for 1 h. The second antibodies used for ELISA were as follows: HRP-linked anti-whole rabbit IgG donkey serum (GE Healthcare, #NA934) for detection of the positive control, HRP-linked anti-pig whole IgG goat antibodies (abcam, #ab6915) for porcine samples, and HRP-linked anti-cow whole IgG goat antibodies (abcam, #ab102154) for bovine samples. After three washes, TMB substrate (TMB Microwell Peroxidase Substrate System, KPL) was added to the

plates, incubated for 5 min in the dark, stopped with 1 M H<sub>2</sub>SO<sub>4</sub>, and measured at wavelengths of 450 nm/550 nm with a microplate reader (Wallac 1420 ARVOsx, Perkin Elmer). Sample to positive (S/P) ratio (%) was calculated as follows: (Sample serum – blank) / (Positive control antibody – blank). S/P ratio > 0.4 was considered as positive [13,14].

### *Statistical analysis*

The results were statistically analyzed using Prism software (GraphPad ver. 8.4.3). Fisher's exact test was employed to assess the association between porcine and bovine seroprevalence.

### **Results**

Anti-FaeG1 and -FaeG2 antibodies in porcine and bovine sera were measured to consider whether K88<sub>O169</sub> can be another option for ETEC. Among the samples tested, a portion of the porcine (18.0%, 36/200) and bovine (17.1%, 18/105) sera reacted to one or both of FaeG1 and FaeG2 antigens of K88<sub>O169</sub> (**Table 1, Figs. 1, 2**). The prevalence of K88<sub>O169</sub> antibodies reacting to FaeG1 and/or FaeG2 did not show any statistical difference between porcine and bovine sera. Antibodies against FaeG1 were detected among 16.0% (32/200) of pigs and 12.4% (13/105) of cattle, respectively; anti-FaeG2 antibodies were found at 7.5% (15/200) of pigs and 9.5% (10/105) of cattle. Prevalence



of antibodies to each of FaeG1 and G2 showed no statistical difference between porcine and bovine sera (FaeG1;  $P=0.4979$ , FaeG2;  $P>0.5199$ ). Anti-FaeG1 single positive sera were more among cattle ( $n=8$ , 7.6%) than pigs ( $n=9$ , 4.5%) ( $P=0.2968$ ) (**Table 2**). Anti-FaeG2 single positive sera were significantly higher among cattle ( $n=4$ , 3.8%;  $P=0.0495$ ) than pigs ( $n=1$ , 0.5%).

In contrast, when we evaluated the prevalence of antibodies against FaeG of K88ac (hereinafter, FaeG<sub>O</sub>, to reflect its originality), a typical adhesion factor of porcine ETEC, the antibodies to FaeG<sub>O</sub> were obviously more prevalent among pigs than cattle (**Table 3**, **Figs. 1, 2**).

Comparison of epitopes of FaeG<sub>O</sub>, FaeG1, and FaeG2 adhesins shows apparent differences in amino acid sequences (**Fig. 3**) [15]. Individuals positive for antibodies to FaeG<sub>O</sub> of K88 did not necessarily cross-react to FaeG1 or FaeG2 of K88<sub>O169</sub>. A total of 27 samples showed a positive reaction to Fae G1 or FaeG2 antigens but not FaeG<sub>O</sub>, and 22 anti-FaeG<sub>O</sub> positive samples were negative to FaeG1 or FaeG2 antigens (**Table 2**).

## **Discussion**

The O169 plasmid pEntYN10 has a total of three CFs (CS6, K88-like, and CFA/III-like) [6]. CS6 is recognized as one of the representative CFs for humans; however, the role of the other two CFs remained to be elucidated. Since the O169 plasmid can be easily eliminated from the bacteria in vitro [6], multiple CFs found in

the plasmid evoked us the possibility that they make the bacteria infect various species of hosts consecutively. We evaluated seroepidemiologically if ETEC possessing K88<sub>O169</sub> could infect pigs because K88 is a classical colonization factor of porcine ETEC.

The porcine and bovine sera reacted to one or both of FaeG1 and FaeG2 antigens of K88<sub>O169</sub>. These results suggest that K88<sub>O169</sub>-positive *E. coli* infect pigs and cattle. Further, the results were not biased toward any particular region because the sera samples were collected from animals reared in various prefectures (**Supporting Table 1**). On the other hand, the FaeG<sub>O</sub> positivity rate was significantly higher among pigs than cattle ( $P < 0.0001$ ), which seroepidemiologically reflects that ETEC possessing K88 colonize more prevalently among pigs. This is consistent with previous reports that the original K88 is a typical adhesion factor of ETEC that causes diarrhea in piglets [16,17].

We considered the possibility that anti-FaeG<sub>O</sub> cross-reacts with FaeG1 and FaeG2. However, epitopes of FaeG<sub>O</sub>, FaeG1, and FaeG2 adhesins show differences in amino acid sequences. Individuals positive for antibodies to FaeG<sub>O</sub>, FaeG1, or FaeG2 alone were observed in both pigs and cattle. These results suggest that individuals infected with the bacteria harboring FaeG1 and FaeG2 are prevalent in these species; the positive reactions to these novel antigens are unlikely due to the cross-reaction of antibodies to FaeG<sub>O</sub>.

CF is generally recognized as being the molecule that determines host specificity. However, our data showed that anti-K88<sub>O169</sub> was prevalent among bovine sera and

porcine sera, suggesting that K88<sub>O169</sub> may provide the strain with a mechanism that allows it to infect multiple hosts. The presence of CS8-like CF plasmid, the third and novel one of the O169 strain, may also enhance survival strategies by expanding the host spectrum bacteria in which it is present. Interestingly, the virulence plasmid pEntYN10 tended to be quickly eliminated *in vitro* because there are fewer genes associated with plasmid maintenance [6]. This plasmid is maintained in ETEC O169 despite this disadvantage, suggesting that the plasmid may provide its bacterial hosts with high fitness to survive in the bacteria.

In conclusion, antibodies to K88<sub>O169</sub> antigens are prevalent among pigs and cattle. Although specific hosts where the K88<sub>O169</sub> acts as CF remain to be revealed, O169 organisms may expand their niches through a unique and complex repertory of CFs. Not only O169 but other serogroups of ETEC possessing K88<sub>O169</sub> can be transmitted from domestic animals to humans or from humans to domestic animals using different adhesins across hosts. We should pay attention to ETEC as a possible pathogen of zoonosis.

## **Acknowledgements**

The authors thank veterinarians Mitsuhiro Tsujimoto, Tomofumi Maehara, Norihide Kuriyama, Hideki Oshima, and Yusuke Kataoka, at the Osaka City Meat Hygiene Inspection Center, for providing porcine and bovine sera.

205

206 **Financial Support**

207 This work was supported by a Grant-in-Aid for Scientific Research (B) (17H04078),  
208 Grant-in-Aid for Early-Career Scientists (19K16639), and Grant-in-Aid for Exploratory  
209 Research (19K22459) from the Japan Society for the Promotion of Science (JSPS).

210

211 **The conflict of interest**

212 The authors declare no competing interests.

213

214 **Author's contributions**

215 YT and YN designed the study. YT, MI, KK, and AO carried out the experiments. YT  
216 analyzed data. EKN was involved in planning and supervised the work. YT, TW, and  
217 YN wrote the paper. All authors received the final manuscript version for approval.

218

## References

1. **Dubreuil JD, Isaacson RE, Schifferli DM.** Animal enterotoxigenic *Escherichia coli*. *EcoSal Plus* 2016; **7** Published online: 11 January 2016.doi:10.1128/ecosalplus.ESP-0006-2016.
2. **Vipin Madhavan TP, Sakellaris H.** Colonization factors of enterotoxigenic *Escherichia coli*. *Advances in Applied Microbiology* 2015; **90**: 155–197.
3. **Mirhoseini A, Amani J, Nazarian S.** Review on pathogenicity mechanism of enterotoxigenic *Escherichia coli* and vaccines against it. *Microbial Pathogenesis* 2018; **117**: 162–169.
4. **Sinha R, et al.** Resistance to ETEC F4/F18–mediated piglet diarrhoea: opening the gene black box. *Tropical Animal Health and Production* 2019; **51**: 1307–1320.
5. **Nishikawa Y, et al.** Heat-stable enterotoxin-producing *Escherichia coli* O169:H41 in Japan. *Emerging infectious diseases* 1995; **1**: 61.
6. **Ban E, et al.** Characterization of unstable pEntYN10 from enterotoxigenic *Escherichia coli* (ETEC) O169: H41. *Virulence* 2015; **6**: 735–744.
7. **Ørskov I, et al.** Simultaneous occurrence of *E. coli* B and L antigens in strains from diseased swine. Influence of cultivation temperature. Two new *E. coli* Kantigens: K 87 and K 88. *Acta Pathologica Microbiologica Scandinavica* 1961; **53**: 404–422.

- 239 8. **Johnson TJ, Nolan LK.** Pathogenomics of the virulence plasmids of  
240 *Escherichia coli*. *Microbiology and Molecular Biology Reviews* 2009; **73**: 750–  
241 774.
- 242 9. **Girardeau JP, et al.** CS31A, a new K88-related fimbrial antigen on bovine  
243 enterotoxigenic and septicemic *Escherichia coli* strains. *Infection and Immunity*  
244 1988; **56**: 2180–2188.
- 245 10. **Michelacci V, et al.** Characterization of a novel plasmid encoding F4-like  
246 fimbriae present in a Shiga-toxin producing enterotoxigenic *Escherichia coli*  
247 isolated during the investigation on a case of hemolytic-uremic syndrome.  
248 *International Journal of Medical Microbiology* 2018; **308**: 947–955.
- 249 11. **Verdonck F, et al.** Conserved regions in the sequence of the F4 (K88) fimbrial  
250 adhesin FaeG suggest a donor strand mechanism in F4 assembly. *Veterinary*  
251 *Microbiology* 2004; **102**: 215–225.
- 252 12. **Almagro Armenteros JJ, et al.** SignalP 5.0 improves signal peptide predictions  
253 using deep neural networks. *Nature Biotechnology* 2019; **37**: 420–423.
- 254 13. **Yahara Y, et al.** Evaluation of enzyme-linked immunosorbent assay (ELISA)  
255 and immunofluorescent antibody (IFA) test for the detection of porcine  
256 reproductive and respiratory syndrome virus (PRRSV) antibody in pigs from  
257 conventional farms. *Journal of Veterinary Medical Science* 2002; **64**: 583–588.
- 258 14. **Li X, et al.** Comparative evaluation of two commercial ELISA kits for detection

of antibodies against Akabane virus in cattle serum. *BMC Veterinary Research*

2019; **15** Published online: 11 November 2019.doi:10.1186/s12917-019-2156-6.

15. **Lu T, Moxley RA, Zhang W.** Mapping the neutralizing epitopes of

enterotoxigenic *Escherichia coli* K88 (F4) fimbrial adhesin and major subunit

FaeG. *Applied and Environmental Microbiology* 2019; **85** Published online: 1

June 2019.doi:10.1128/AEM.00329-19.

16. **Woodward MJ, et al.** DNA probes for the detection of toxin genes in

*Escherichia coli* isolated from diarrhoeal disease in cattle and pigs. *Veterinary*

*Microbiology* 1990; **22**: 277–290.

17. **Luppi A.** Swine enteric colibacillosis: Diagnosis, therapy and antimicrobial

resistance. *Porcine Health Management* 2017; **3** Published online: 8 August

2017.doi:10.1186/s40813-017-0063-4.

## **Figure legends**

### **Fig. 1. Indirect ELISA plot of porcine serum**

Individual porcine sera against FaeG1 (A), FaeG2 (B), and FaeG<sub>O</sub> (C) plotted as the S/P ratio.

### **Fig. 2. Indirect ELISA plot of bovine serum**

Individual bovine sera against FaeG1 (A), FaeG2 (B), and FaeG<sub>O</sub> (C) plotted as the S/P ratio.

### **Fig. 3. Epitope comparison of FaeG<sub>O</sub>, FaeG1 and FaeG2**

The amino acid sequences of FaeG<sub>O</sub>, FaeG1, and FaeG2 were aligned using ClustalW. Residues identical to FaeG<sub>O</sub> are shown as dots. Hyphens indicate positions where residues are missing. The residues enclosed in a square are the epitope referenced in a previous study [15].



272 **Table 1. Prevalence of antibodies against FaeG1 and FaeG2 among porcine and bovine sera**

| Antigens (K88 <sub>O169</sub> ) |       | Porcine sera (n=200) | Bovine sera (n=105) | P value† |
|---------------------------------|-------|----------------------|---------------------|----------|
| FaeG1                           | FaeG2 | (%)                  | (%)                 |          |
| +                               | +     | 11                   | 5                   | P>0.9999 |
|                                 |       | (5.5%)               | (4.76%)             |          |
| +                               | -     | 21                   | 8                   | P=0.5386 |
|                                 |       | (10.5%)              | (7.62%)             |          |
| -                               | +     | 4                    | 5                   | P=0.2834 |
|                                 |       | (2.0%)               | (4.76%)             |          |
| -                               | -     | 164                  | 87                  | P>0.9999 |
|                                 |       | (82.0%)              | (82.9%)             |          |

273 †Fisher's exact test was employed to assess the association between porcine and bovine seroprevalence.

274 **Table 2. Prevalence of antibodies against FaeGo, FaeG1, and FaeG2 among porcine and bovine sera**

| Antigens    |                             |                              | Porcine sera<br>(n=200)<br>No. of samples (%) | Bovine sera (n=105)<br>No. of samples (%) | P value†   |
|-------------|-----------------------------|------------------------------|-----------------------------------------------|-------------------------------------------|------------|
| FaeGo (K88) | FaeG1(K88 <sub>O169</sub> ) | FaeG2 (K88 <sub>O169</sub> ) |                                               |                                           |            |
| +           | +                           | +                            | 8 (4.0)                                       | 3 (2.9)                                   | P=0.7535   |
| +           | +                           | -                            | 12 (6.0)                                      | 0 (0)                                     | **P=0.0098 |
| +           | -                           | +                            | 3 (1.5)                                       | 1 (1.0)                                   | P>0.9999   |
| -           | +                           | +                            | 3 (1.5)                                       | 2 (1.9)                                   | P>0.9999   |
| +           | -                           | -                            | 21 (10.5)                                     | 1 (1.0)                                   | **P=0.0017 |
| -           | +                           | -                            | 9 (4.5)                                       | 8 (7.6)                                   | P=0.2968   |
| -           | -                           | +                            | 1 (0.5)                                       | 4 (3.8)                                   | *P=0.0495  |
| -           | -                           | -                            | 143 (71.5)                                    | 86 (81.9)                                 | P=0.0515   |

275 †Fisher's exact test was employed to assess the association between porcine and bovine seroprevalence.

276 **Table 3. Prevalence of antibodies against FaeGo among porcine and bovine sera**

| Antigens (K88) | Porcine sera (n=200) | Bovine sera (n=105) | P value†    |
|----------------|----------------------|---------------------|-------------|
| FaeGo          | (%)                  | (%)                 |             |
| +              | 44<br>(22.0%)        | 5<br>(4.8%)         | ***P<0.0001 |
| -              | 156<br>(78.0%)       | 100<br>(95.2%)      | ***P<0.0001 |

277 †Fisher's exact test was employed to assess the association between porcine and bovine seroprevalence.

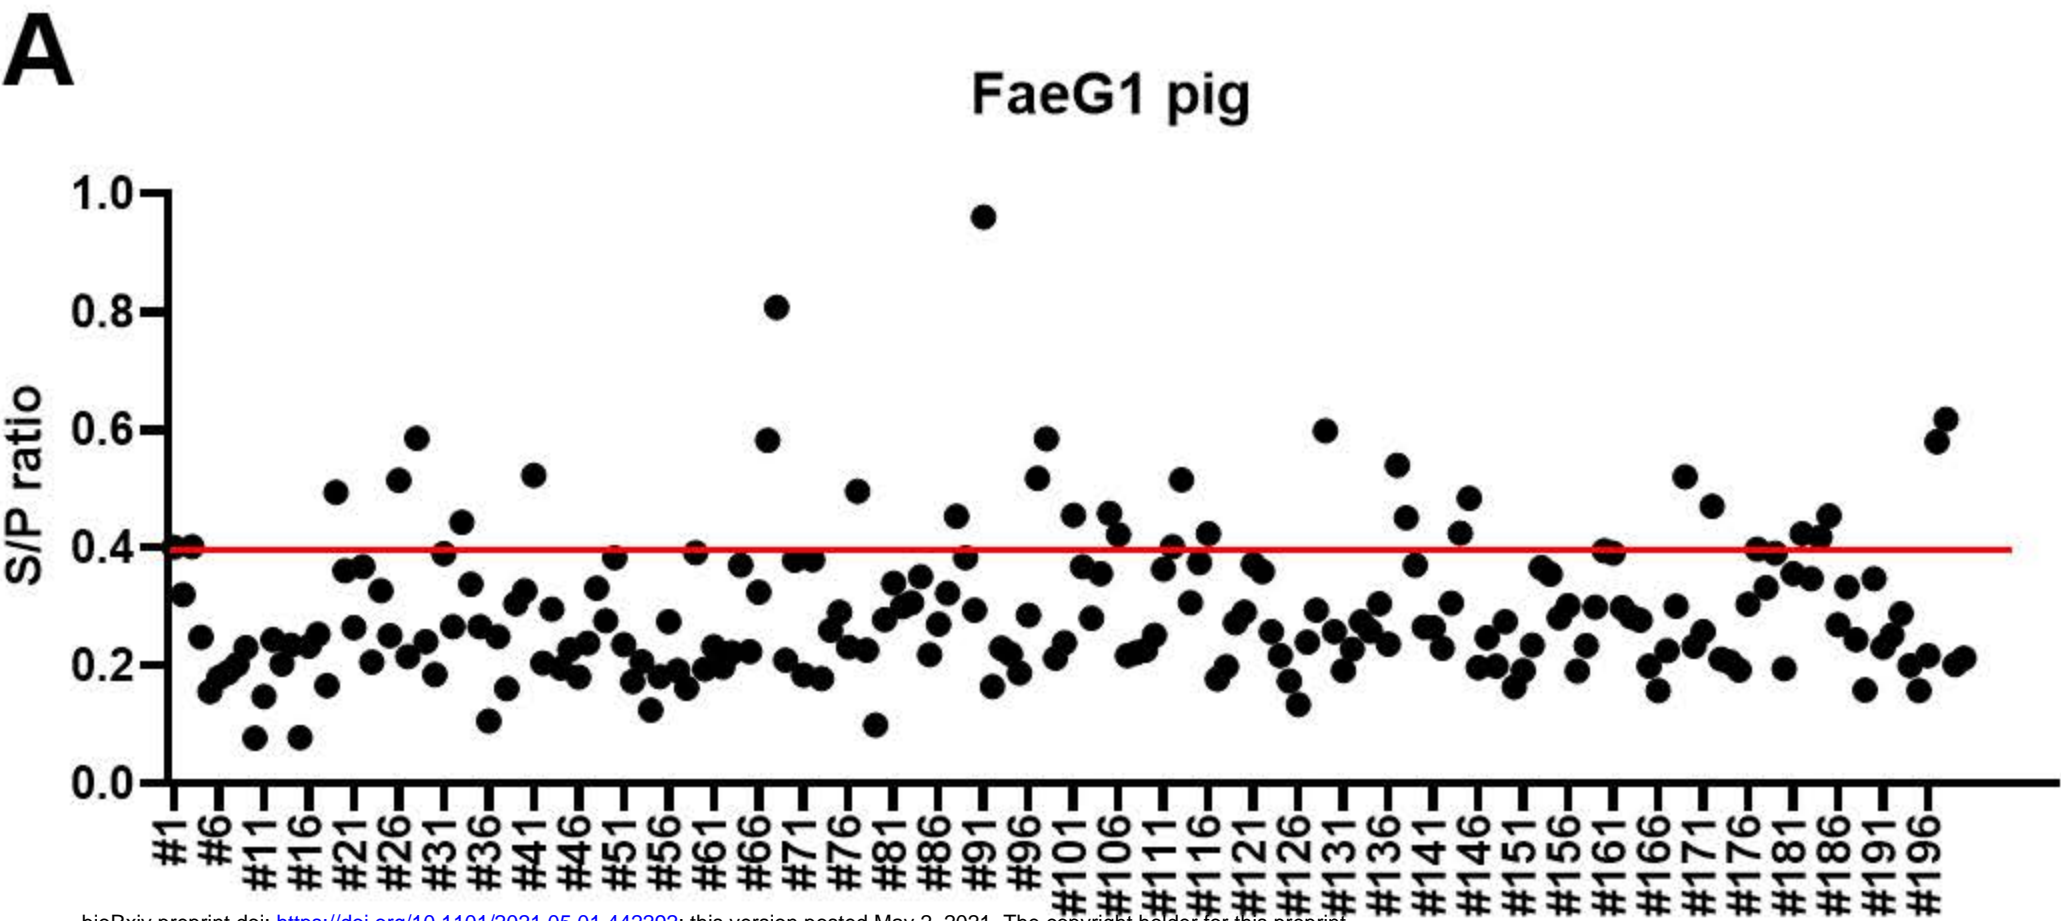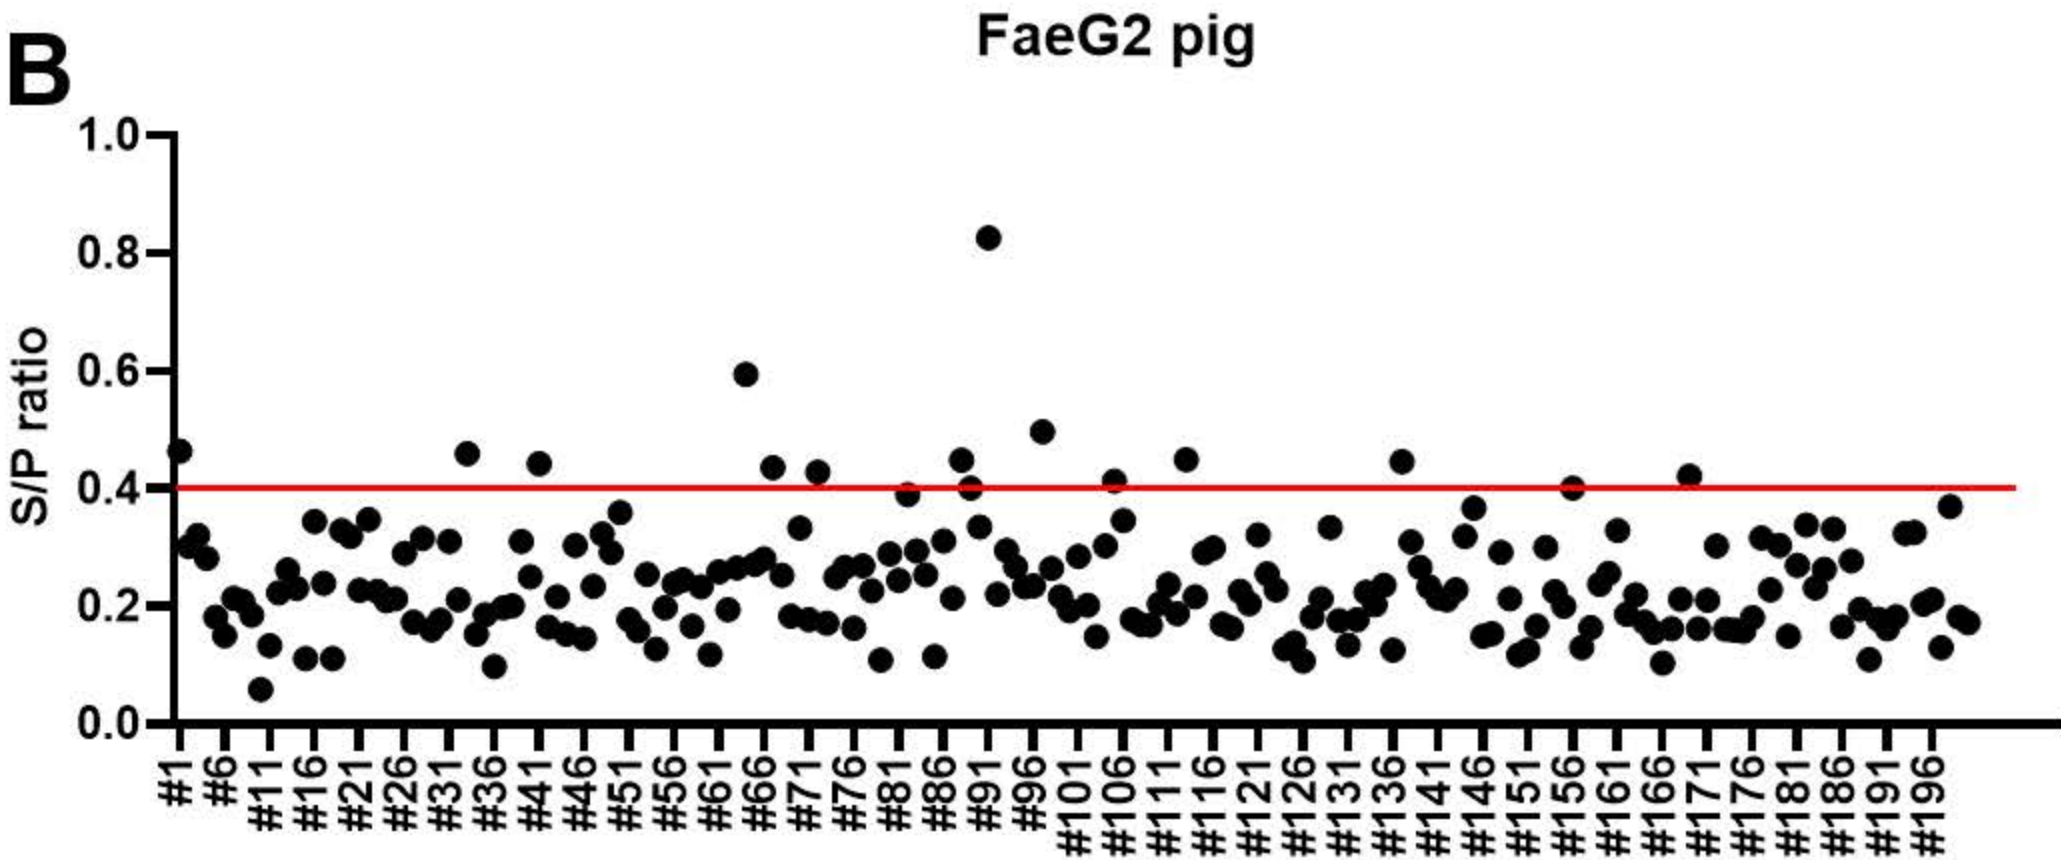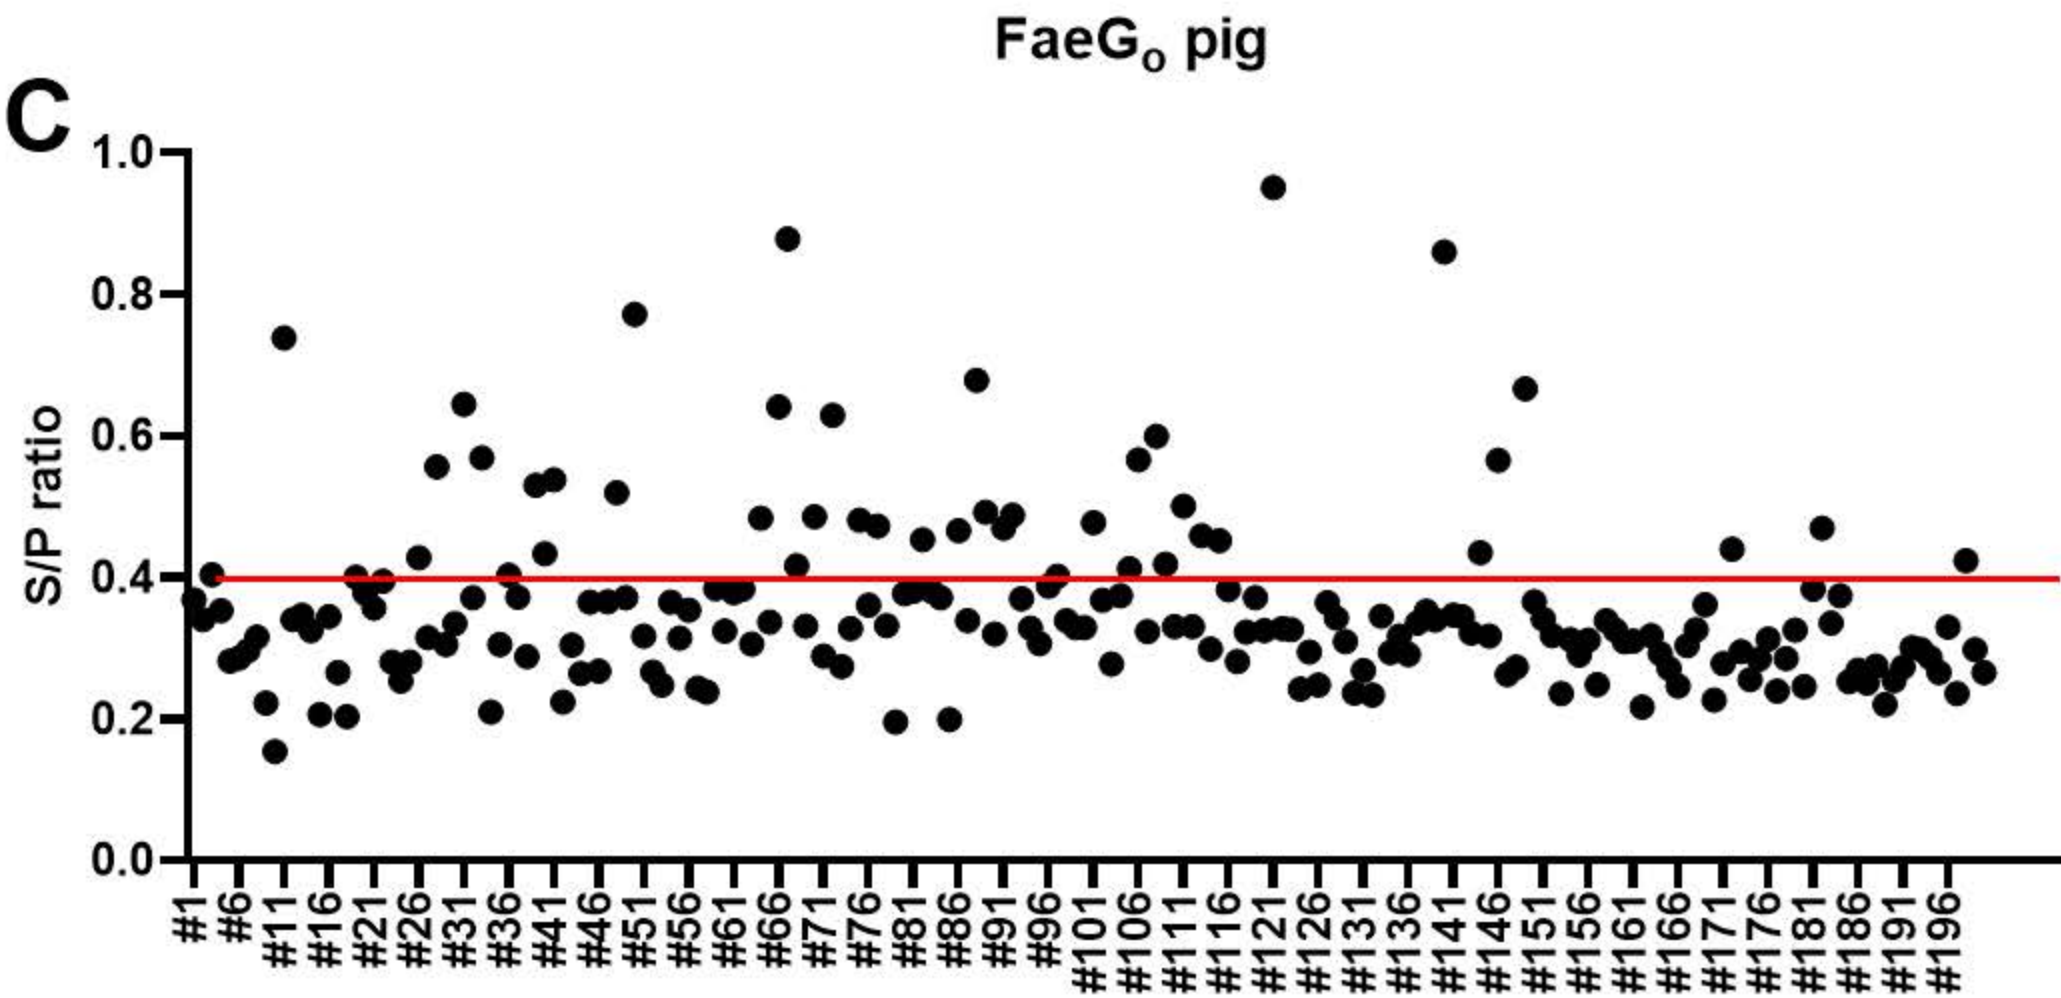

Figure 1

**A****FaeG1 cattle**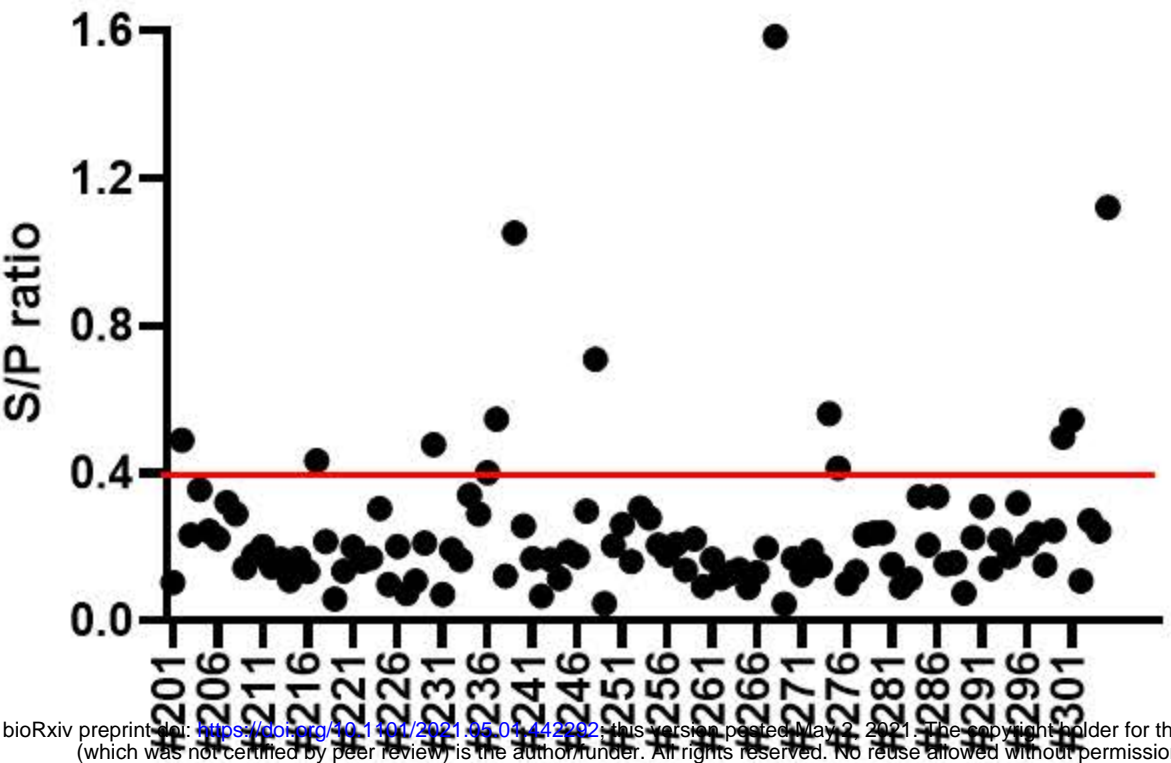**B****FaeG2 cattle**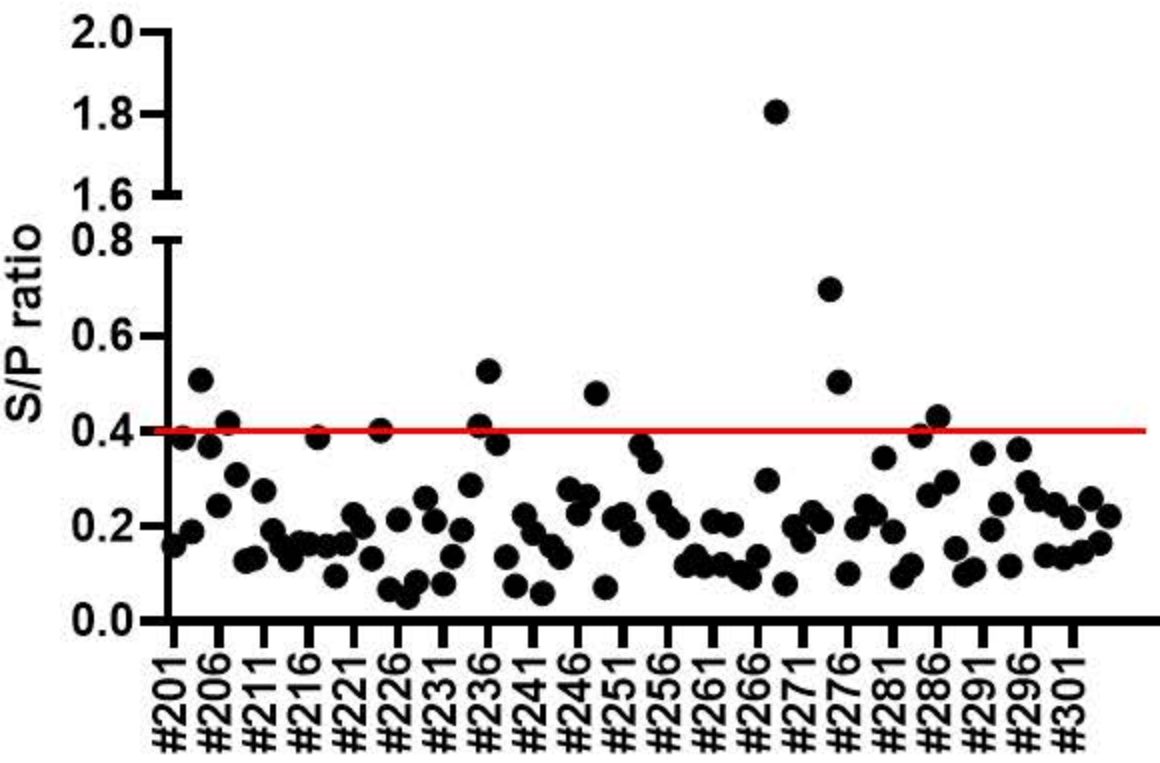**C****FaeG<sub>0</sub> cattle**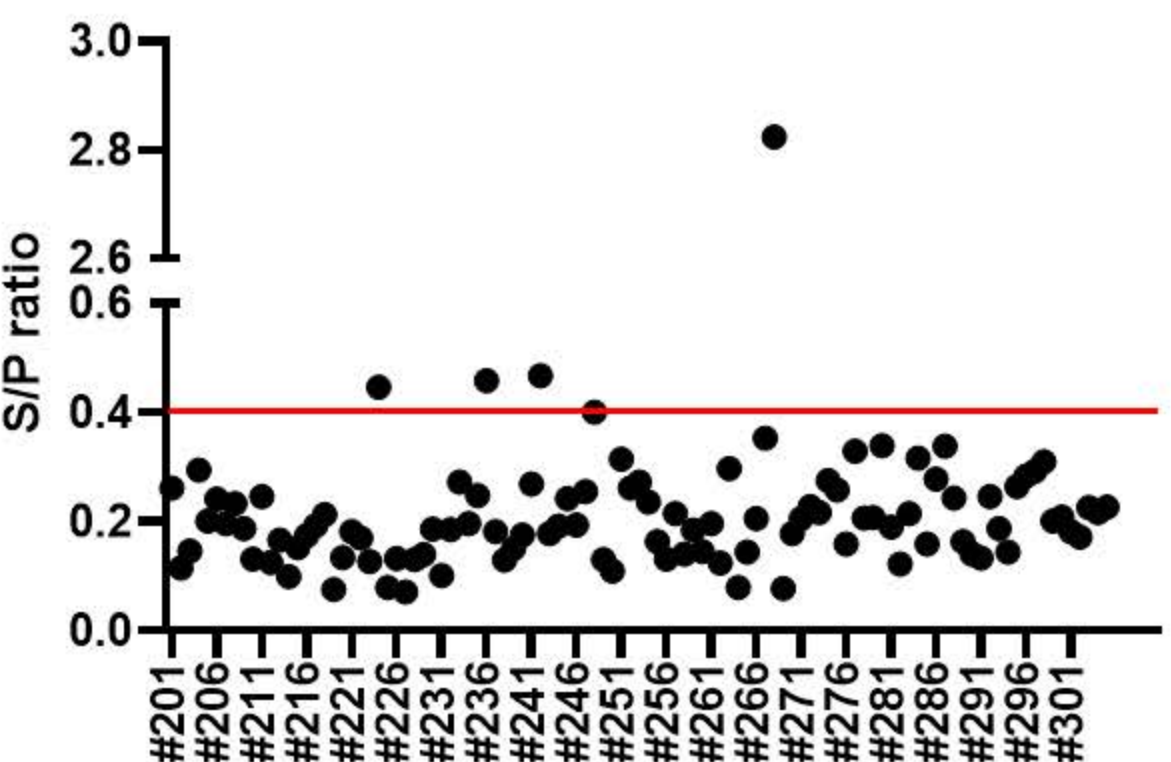

Figure 2



|                      |             |             |             |            |            |            |     |
|----------------------|-------------|-------------|-------------|------------|------------|------------|-----|
| faeG_K88ac_AJ616239_ | MKKTLIALAI  | AASAASGMAH  | AWMTGDFNGS  | VDIGGTITAD | DYRQKWEWEV | 50         |     |
| faeG1_K88_O169_      | .....CV     | .MVSG.-.-M  | ...S.....T  | .....EKT   | E.KA..Q.KS | 48         |     |
| faeG2_K88_O169_      | ..LHK..MIM  | .CMVSTP-.L  | ...SN.....  | ...SV.PE   | Q.S.L.Q.K. | 49         |     |
| faeG_K88ac_AJ616239_ | GTGLNGFGNV  | LNDLTNGGTK  | LTITVTGNKP  | ILLGRTKEAF | ATPVTGGVDG | 100        |     |
| faeG1_K88_O169_      | ...FDS.A.T  | T.Q.RVN...  | .V.P..ED..  | ...K.T...  | SSS.-...AA | 97         |     |
| faeG2_K88_O169_      | ...N.N.D    | AEQMSANF..  | ..VR..EAQ.  | ..I.N..SPV | VAYN-.A.GI | 98         |     |
| faeG_K88ac_AJ616239_ | IPHIAFTDYE  | GASVVLARNPD | GETNKNGLAY  | FVLP       | PMKNAEG    | -TKVGSVKVN | 149 |
| faeG1_K88_O169_      | V.N.V.RG.D  | .TI.S.QASG  | -.-SGD.TH.  | LE..       | I.E.DA     | DVRI.TLR.. | 144 |
| faeG2_K88_O169_      | T.K.S.S.F.  | NNK.D.KQES  | -.-SSPG.VGF | .N..       | V..SDN     | ND.I.T...  | 146 |
| faeG_K88ac_AJ616239_ | ASYAGVLGR-  | -.-GGVTSADG | ELLSLFADGL  | SSIFYGGLPR | GYELSAGSAA | 196        |     |
| faeG1_K88_O169_      | VTA...VAK-  | -.-E.DS-.-I | Q.N.VESTQN  | .EV.F...IS | NAVVDSAT   | 189        |     |
| faeG2_K88_O169_      | .TAV.IGLHS  | ENY.SFGLIY  | AVR.IT.TSN  | EHL...AVFE | RSMSNGY.NG | 196        |     |
| faeG_K88ac_AJ616239_ | AARTKLFGSL  | SRDDILGQIQ  | R-.-VNANIT  | SLVDVAGSYR | ENMEYTDG   | -.-        | 241 |
| faeG1_K88_O169_      | ..T.AK....  | .ATELQQ.V.  | N-.-.GTL.   | T.TEGTSKQT | .TLVDQN.   | -.-        | 234 |
| faeG2_K88_O169_      | D.FASRLNNV  | NKQELKRVLF  | THPS.T.GG.  | W.S.N.SPFS | LSKNGAGANA | 246        |     |
| faeG_K88ac_AJ616239_ | -.-NVVSAAYA | LGIANGQTIE  | ATFNQAVTTS  | TQWSAPLNVA | ITYY       | 283        |     |
| faeG1_K88_O169_      | -.-K..A.... | M.MS....L.  | ...K...SE   | VN.K..M.IV | VS.Q       | 276        |     |
| faeG2_K88_O169_      | IDG.IT.S.S  | ...DA..SL.  | FE.YNPI.ST  | .K.....I.  | V..N       | 290        |     |

Figure 3
